# Supplementary material for: Whole Genome Comparison Reveals High Levels of Inbreeding and Strain Redundancy Across the Spectrum of Commercial Wine Strains ofSaccharomyces cerevisiae
Source: Oxford University Press journal article supplement (doi:10.1534/g3.115.025692), 2016-03-08
Supplement: 025692_figures1.pdf [file 025692_figures1.pdf]

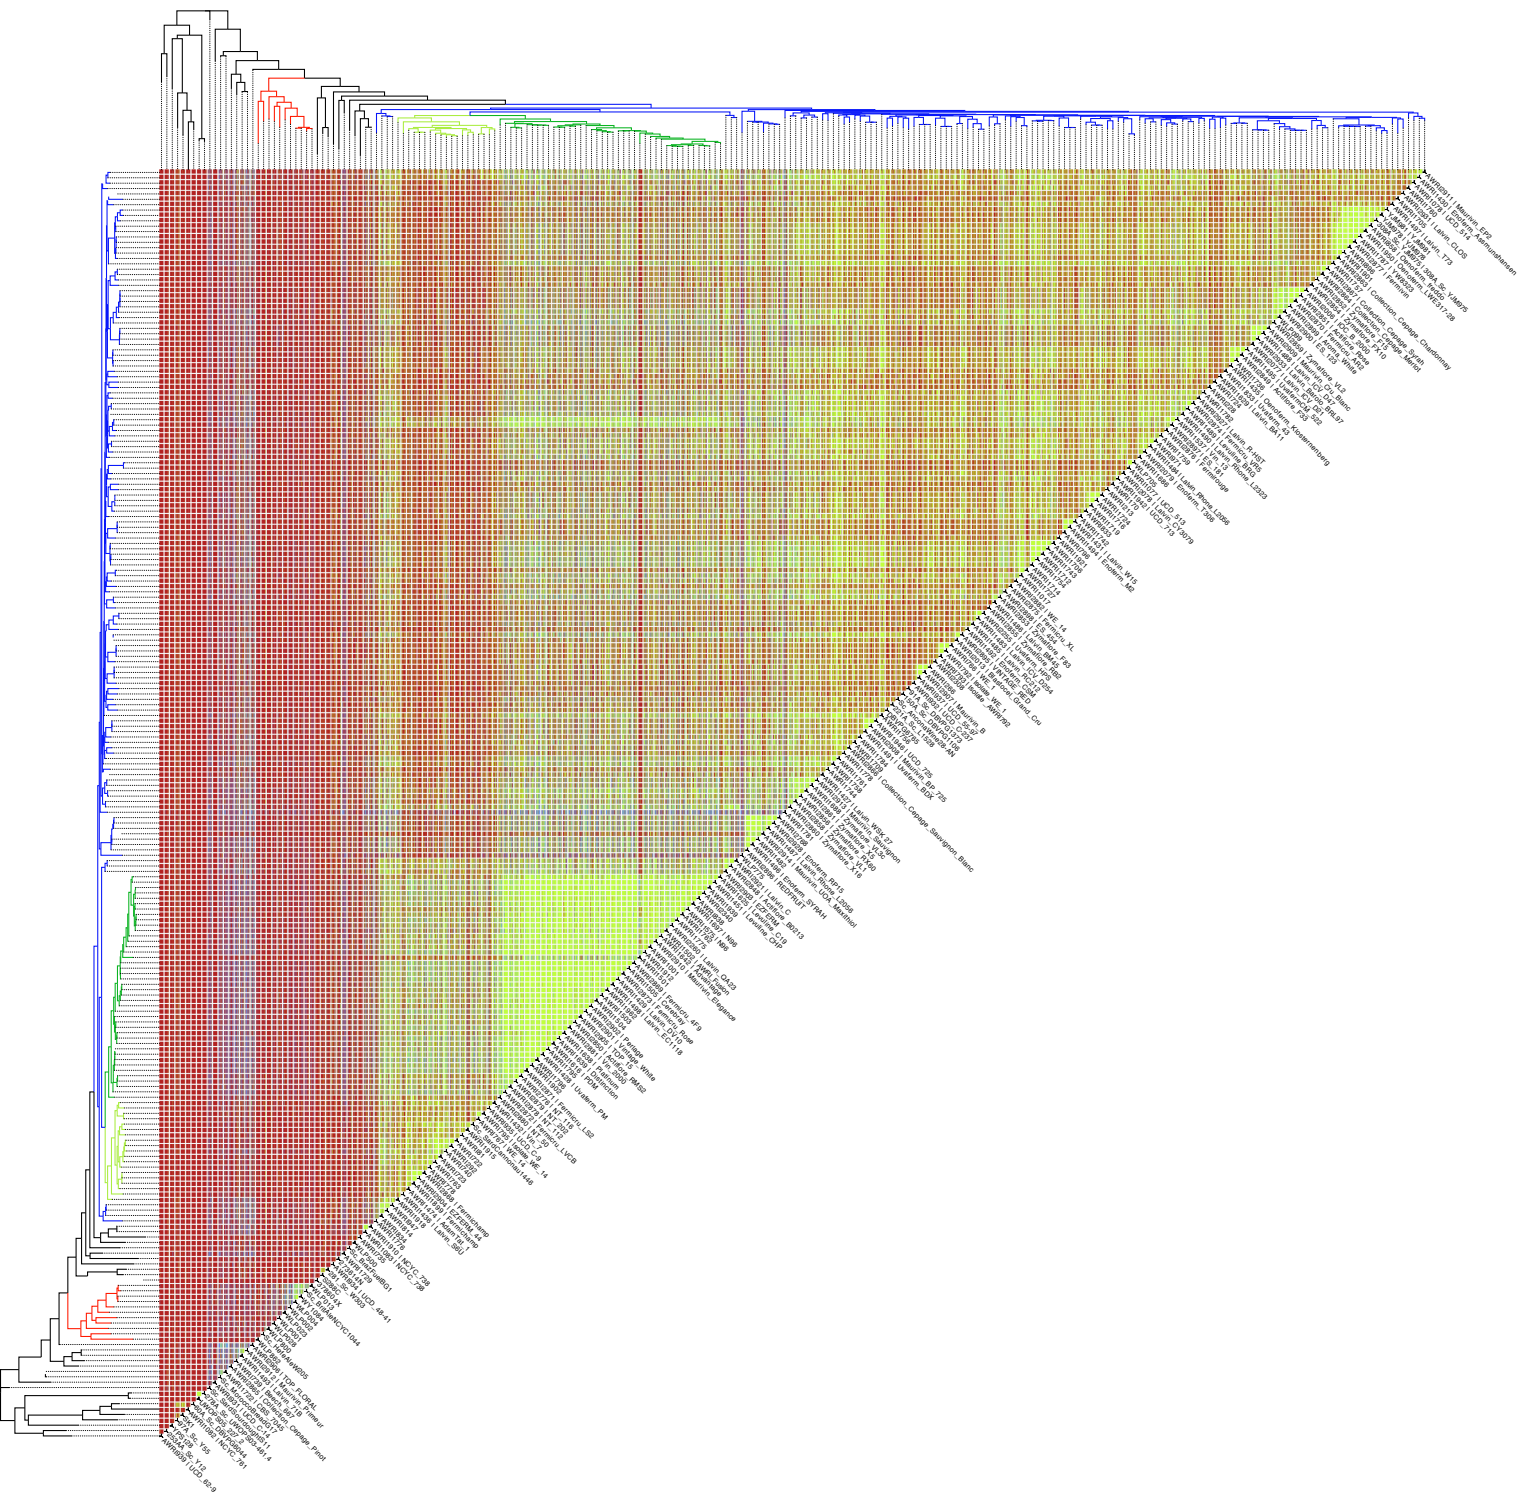

Figure S1. Identity-by-state (IBS) analysis. SNPs were compared pairwise, across the collection of strains, with each variant position scored according to the pattern of nucleotide conservation. IBS state 2 (IBS2) represents identical diploid genotypes (e.g. AA:AA, AT:AT), IBS1 loci share one allele (e.g. AA:AT; AC:AT) while IBS0 loci are completely different (e.g. AA:TT; AT:CG). Results were then smoothed using a 50 kb sliding window with a 25 kb step with individual windows categorized according to four genomic states IBS2 (<5% IBS1, <1% IBS0; green), IBS2|1 (<5% IBS1, <1% IBS0; blue), IBS2|1|0 (<5% IBS1, <1% IBS0; red) and IBS2|0 (<5% IBS1, <1% IBS0; red).
