# Supplementary material for: Whole Genome Comparison Reveals High Levels of Inbreeding and Strain Redundancy Across the Spectrum of Commercial Wine Strains ofSaccharomyces cerevisiae
Source: Oxford University Press journal article supplement (doi:10.1534/g3.115.025692), 2016-03-08
Supplement: 025692_figures3.pdf [file 025692_figures3.pdf]

I II III IV V VI VII VIII IX X XI XII XIII XIV XV XVI

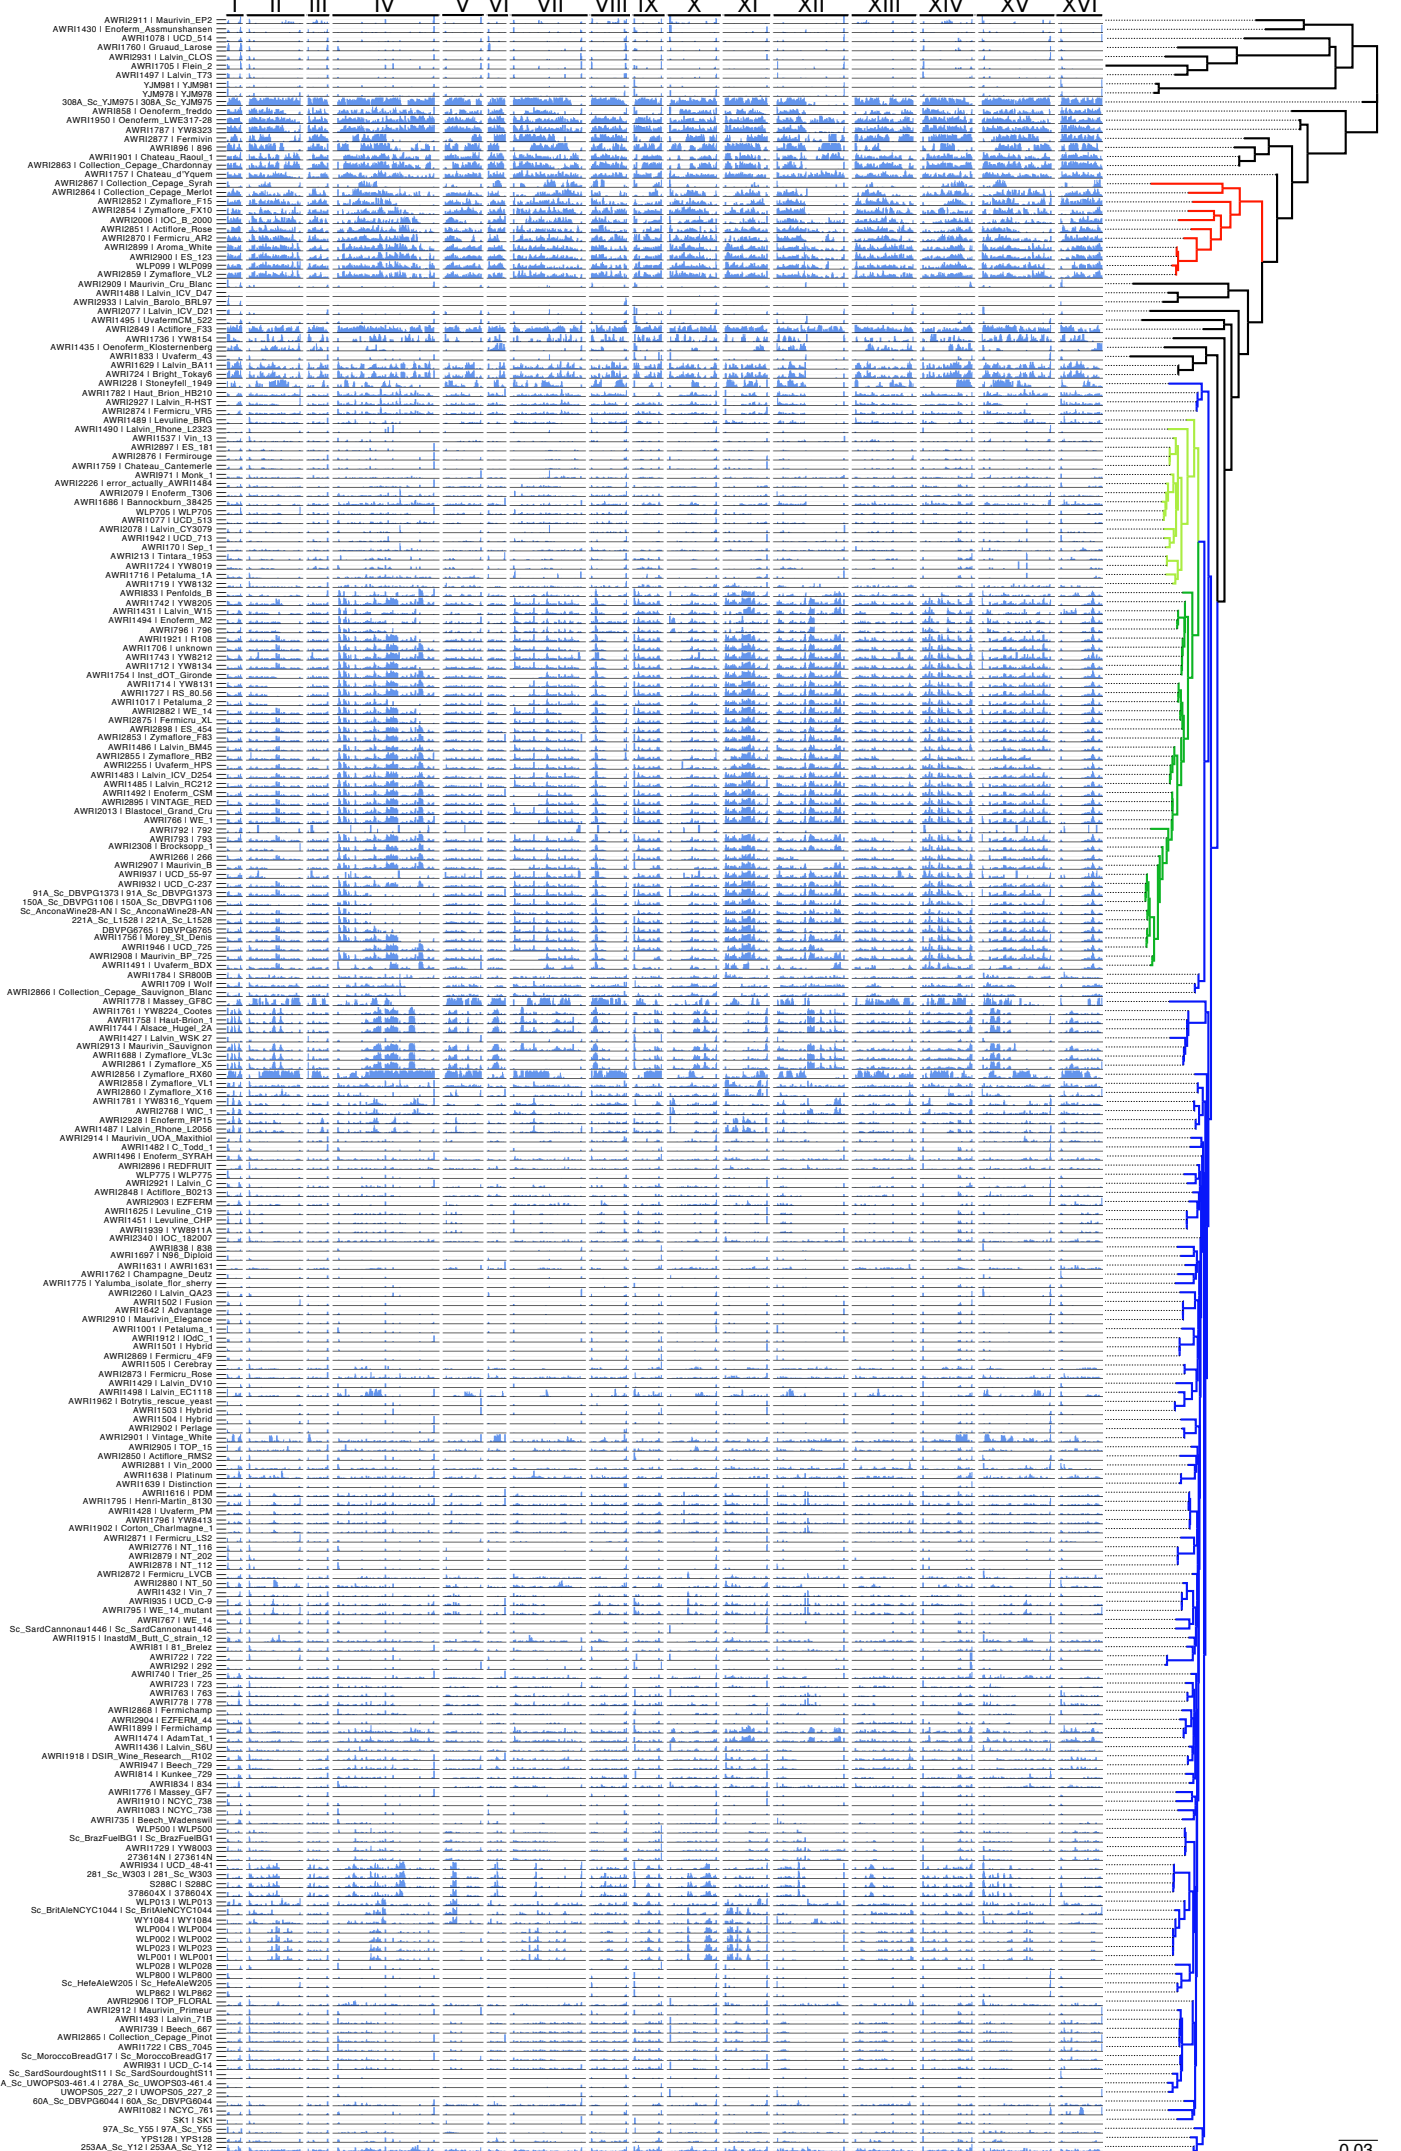

Figure S3. Heterozygosity in *S. cerevisiae* wine strains. Heterozygosity levels observed in 50 kb sliding windows (25 kb step) across the *S. cerevisiae* chromosomes (I - XVI) in each strain. Strains are ordered according to the genome-wide SNP phylogeny and colored according to clade (ale, red; wine, blue and green; PdM, dark green, VIN7, light green).
